# Supplementary material for: Polyurea-catalyzed cycloaddition of CO2 and epichlorohydrin: a green approach
Source: Royal Society of Chemistry journal article supplement (doi:10.1039/d4nj04474f), 2024-11-25
Supplement: d4nj04474f1.pdf [file d4nj04474f1.pdf]

## **Polyurea-catalyzed cycloaddition of CO<sub>2</sub> and epichlorohydrin: a green approach**

Abdussalam K. Qaroush,<sup>\*a</sup> Suhad B. Hammad,<sup>a</sup> Ala'a F. Eftaiha,<sup>\*b</sup> Khaleel I. Assaf,<sup>c</sup> Feda'a M. Al-Qaisi,<sup>b</sup> and Philip G. Jessop<sup>\*a,b,d</sup>

<sup>a</sup> Department of Chemistry, Faculty of Science, The University of Jordan, 11942 Amman, Jordan.

<sup>b</sup> Department of Chemistry, Faculty of Science, The Hashemite University, Zarqa 13133, Jordan.

<sup>c</sup> Department of Chemistry, Faculty of Science, Al-Balqa Applied University, Al-Salt 19117, Jordan.

<sup>d</sup> Department of Chemistry, Queen's University, 90 Bader Lane, Kingston, Ontario, Canada K7L 2S8.

**\* Corresponding Author E-mails:** [a.qaroush@ju.edu.jo](mailto:a.qaroush@ju.edu.jo); [alaa.eftaiha@hu.edu.jo](mailto:alaa.eftaiha@hu.edu.jo); [jessop@queensu.ca](mailto:jessop@queensu.ca)

## **Electronic Supplementary Information (ESI)**

## Table of Contents

|                                                                   |    |
|-------------------------------------------------------------------|----|
| 1. Characterization of the Synthesized Polyurea (PU) .....        | 6  |
| 2. <sup>1</sup> H NMR spectra of the cycloaddition reaction ..... | 8  |
| 3. Side reaction of PU with ECH .....                             | 15 |
| 4. DFT-optimized geometries.....                                  | 16 |

## Table of Figures and Scheme

|                                                                                                                                                                                                                                                                                                                                                                                         |   |
|-----------------------------------------------------------------------------------------------------------------------------------------------------------------------------------------------------------------------------------------------------------------------------------------------------------------------------------------------------------------------------------------|---|
| <b>Figure S1.</b> $^1\text{H}$ NMR spectrum of <b>PU</b> in $\text{DMSO-}d_6$ .....                                                                                                                                                                                                                                                                                                     | 5 |
| <b>Figure S2.</b> $^{13}\text{C}$ NMR spectrum of <b>PU</b> in $\text{DMSO-}d_6$ . <b>X</b> : toluene.....                                                                                                                                                                                                                                                                              | 6 |
| <b>Figure S3.</b> $^1\text{H}$ NMR spectrum of the reaction mixture after the conversion of ECH into its corresponding carbonate in $\text{DMSO-}d_6$ , $\text{X}_1$ and $\text{X}_2$ : corresponding for the 3-chloropropane-1,2-diol (from the starting material as supplied by the chemical vendor).....                                                                             | 7 |
| <b>Figure S4.</b> $^1\text{H}$ NMR spectrum of the reaction mixture after the conversion of ECH into its corresponding carbonate in $\text{DMSO-}d_6$ , $\text{X}_1$ and $\text{X}_2$ : corresponding for the 3-chloropropane-1,2-diol (from the starting material as supplied by the chemical vendor).....                                                                             | 7 |
| <b>Figure S5.</b> $^1\text{H}$ NMR spectrum of the reaction mixture after the conversion of ECH into its corresponding carbonate in $\text{DMSO-}d_6$ , $\text{X}_1$ and $\text{X}_2$ : corresponding for the 3-chloropropane-1,2-diol (from the starting material as supplied by the chemical vendor).....                                                                             | 8 |
| <b>Figure S6.</b> $^1\text{H}$ NMR spectrum of the reaction mixture after the conversion of ECH into its corresponding carbonate in $\text{DMSO-}d_6$ , $\text{X}_1$ and $\text{X}_2$ : corresponding for the 3-chloropropane-1,2-diol (from the starting material as supplied by the chemical vendor). Peaks centered at 7.0, 7.3 and 8.4 corresponding to the <b>PU</b> catalyst..... | 8 |
| <b>Figure S7.</b> $^1\text{H}$ NMR spectrum of the reaction mixture after the conversion of ECH into its corresponding carbonate in $\text{DMSO-}d_6$ , $\text{X}_1$ and $\text{X}_2$ : corresponding for the 3-chloropropane-1,2-diol (from the starting material as supplied by the chemical vendor).....                                                                             | 9 |
| <b>Figure S8.</b> $^1\text{H}$ NMR spectrum of the reaction mixture after the conversion of ECH into its corresponding carbonate in $\text{DMSO-}d_6$ , $\text{X}_1$ and $\text{X}_2$ : corresponding for the 3-chloropropane-1,2-diol (from the starting material as supplied by the chemical vendor).....                                                                             | 9 |

|                                                                                                                                                                                                                                                                                                                                                                                                                                                                                                  |    |
|--------------------------------------------------------------------------------------------------------------------------------------------------------------------------------------------------------------------------------------------------------------------------------------------------------------------------------------------------------------------------------------------------------------------------------------------------------------------------------------------------|----|
| <b>Figure S9.</b> $^1\text{H}$ NMR spectrum of the reaction mixture after the conversion of ECH into its corresponding carbonate in $\text{DMSO-}d_6$ , $\text{X}_1$ and $\text{X}_2$ : corresponding for the 3-chloropropane-1,2-diol (from the starting material as supplied by the chemical vendor).....                                                                                                                                                                                      | 10 |
| <b>Figure S10.</b> $^1\text{H}$ NMR spectrum of the reaction mixture after the conversion of ECH into its corresponding carbonate in $\text{DMSO-}d_6$ , $\text{X}_1$ and $\text{X}_2$ : corresponding for the 3-chloropropane-1,2-diol (from the starting material as supplied by the chemical vendor).....                                                                                                                                                                                     | 10 |
| <b>Figure S11.</b> $^1\text{H}$ NMR spectrum of the reaction mixture after the conversion of ECH into its corresponding carbonate in $\text{DMSO-}d_6$ . Peaks centered at 7.1, 7.3 and 8.5 corresponding to the <b>PU</b> catalyst. ....                                                                                                                                                                                                                                                        | 11 |
| <b>Figure S12.</b> $^1\text{H}$ NMR spectrum of the reaction mixture after the conversion of ECH into its corresponding carbonate in $\text{DMSO-}d_6$ .....                                                                                                                                                                                                                                                                                                                                     | 11 |
| <b>Figure S13.</b> $^1\text{H}$ NMR spectrum of the isolated 4-chloromethyl-2-oxo-1,3-dioxolane in $\text{DMSO-}d_6$ , peak at 3.6 corresponds to 3-chloropropane-1,2-diol (from the starting material as supplied by the chemical vendor). ....                                                                                                                                                                                                                                                 | 12 |
| <b>Figure S14.</b> $^1\text{H}$ NMR spectra of the isolated 4-chloromethyl-2-oxo-1,3-dioxolane in $\text{DMSO-}d_6$ , for five consecutive cycles (first run). Peaks at 3.6 correspond to 3-chloropropane-1,2-diol (from the starting material as supplied by the chemical vendor). Peaks labelled with asterisk corresponding to traces of residual solvents used in the isolation process (blue asterisk for hexane, green asterisk for ethyl acetate, and purple asterisk for methanol). .... | 12 |
| <b>Figure S15. A.</b> The recyclability of <b>PU</b> over seven catalytic cycles for the reaction of ECH and $\text{CO}_2$ (second run). <b>B.</b> $^1\text{H}$ NMR spectra of the isolated 4-chloromethyl-2-oxo-1,3-dioxolane in $\text{DMSO-}d_6$ , peaks at 3.6 and 5.3 correspond to 3-chloropropane-1,2-diol (from the starting material as supplied by the chemical vendor). Peaks labelled with asterisk corresponding to traces of                                                       |    |

residual solvents used in the isolation process (blue asterisk for hexane, green asterisk for ethyl acetate, and purple asterisk for methanol). .....13

**Figure S16.** DFT-optimized geometries of all species involved in the calculated reaction profile.

Calculations were performed at B3LPY/6-311+G(d)-D3 in DMSO.....15

**Scheme S1.** The side reaction of the **PU** with ECH and CO<sub>2</sub> to produce the **PU'** .....12

## 1. Characterization of the Synthesized Polyurea (PU)

### 1.1. $^1\text{H}$ NMR calculation for the degree of polymerization (DP) of PU

The DP of the PU was determined using end group analysis from  $^1\text{H}$  NMR spectroscopy. The integration of the methyl protons (labeled as 5) in urethane moiety served as a reference (3H). DP was evaluated by subtracting the integration obtained of the two protons from the urea nitrogens within the repeating unit from the integration of the NH protons outside the repeating unit using the following equation:  $\text{DP} = (\int \text{NH}_{(\text{inside the repeating unit})} - \text{NH}_{(\text{outside the repeating unit})})/2$ . Accordingly, the DP was calculated to be 59.

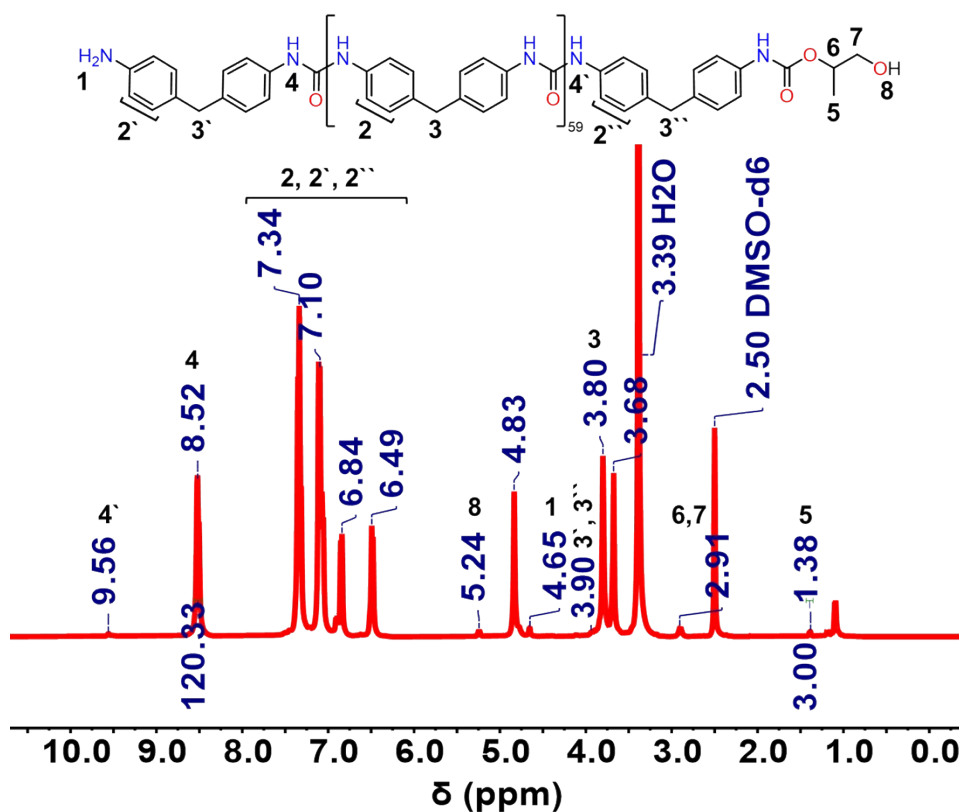

Figure S1.  $^1\text{H}$  NMR spectrum of PU in  $\text{DMSO-}d_6$ .

## 1.2. $^{13}\text{C}$ NMR of PU

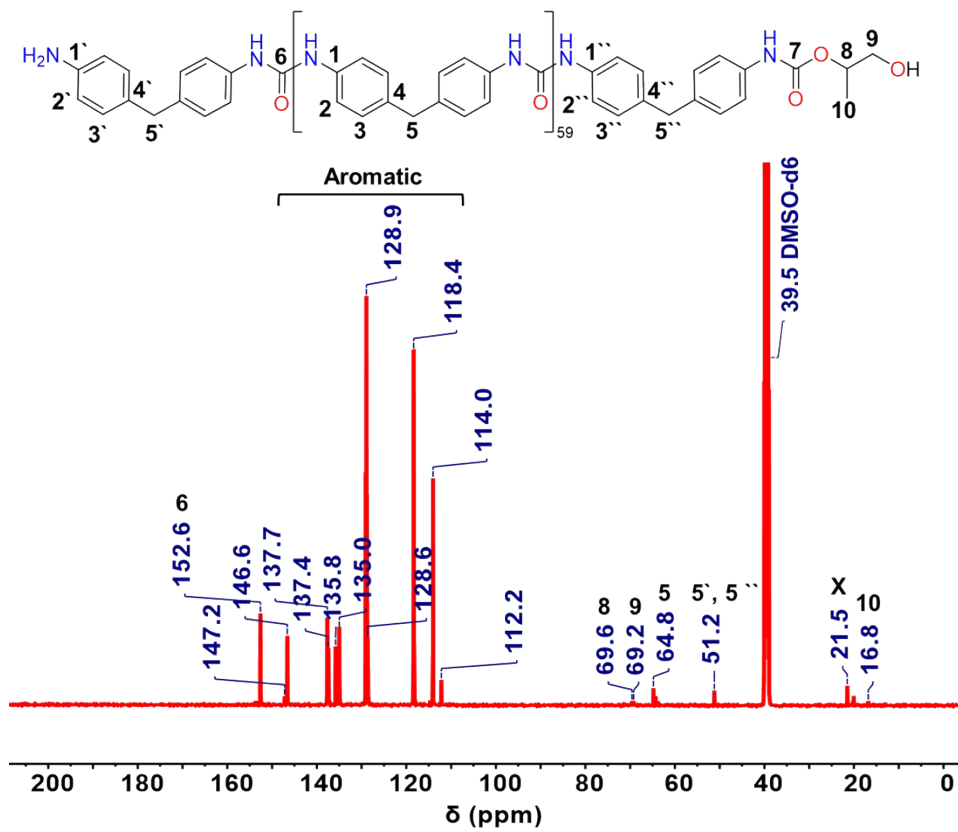

Figure S2.  $^{13}\text{C}$  NMR spectrum of PU in  $\text{DMSO-}d_6$ . X: toluene.

## 2. $^1\text{H}$ NMR spectra of the cycloaddition reaction

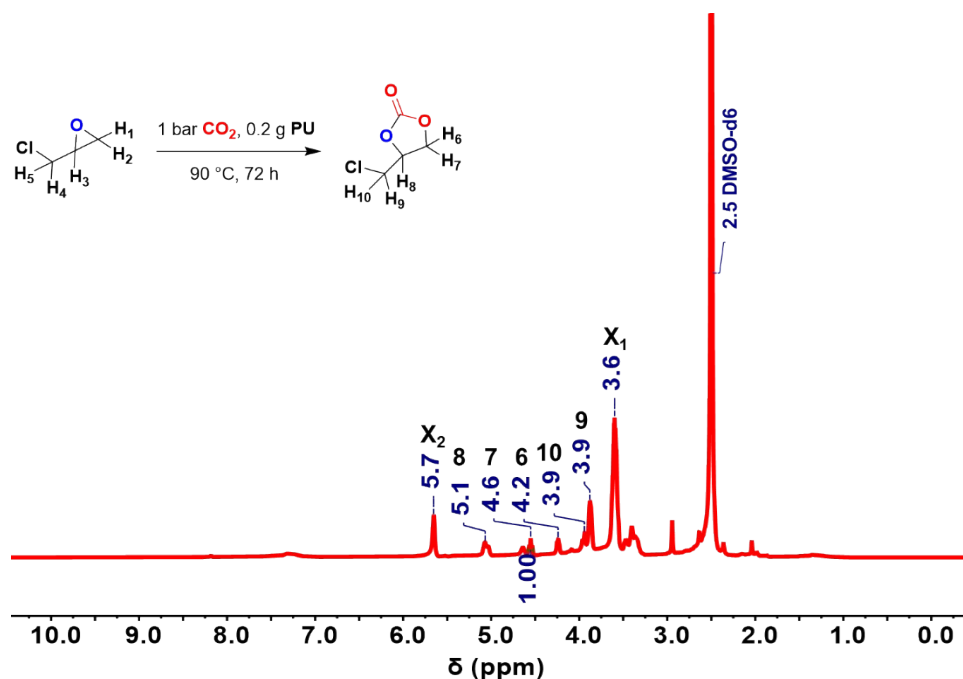

**Figure S3.**  $^1\text{H}$  NMR spectrum of the reaction mixture after the conversion of ECH into its corresponding carbonate in DMSO-*d*<sub>6</sub>, X<sub>1</sub> and X<sub>2</sub>: corresponding for the 3-chloropropane-1,2-diol (from the starting material as supplied by the chemical vendor).

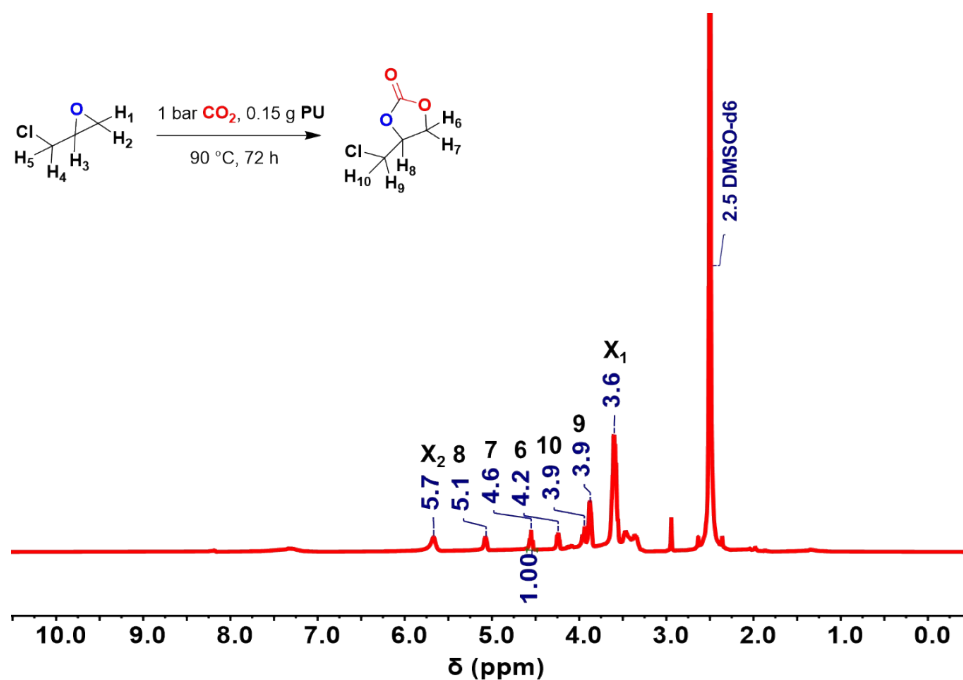

**Figure S4.**  $^1\text{H}$  NMR spectrum of the reaction mixture after the conversion of ECH into its corresponding carbonate in DMSO-*d*<sub>6</sub>, X<sub>1</sub> and X<sub>2</sub>: corresponding for the 3-chloropropane-1,2-diol (from the starting material as supplied by the chemical vendor).



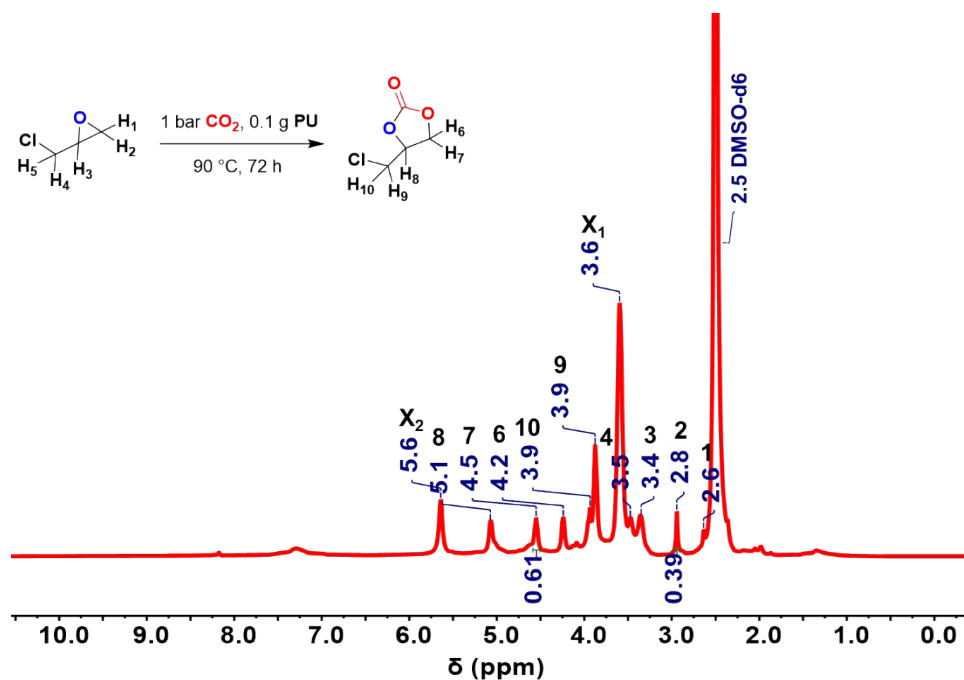

**Figure S5.** <sup>1</sup>H NMR spectrum of the reaction mixture after the conversion of ECH into its corresponding carbonate in DMSO-*d*<sub>6</sub>, X<sub>1</sub> and X<sub>2</sub>: corresponding for the 3-chloropropane-1,2-diol (from the starting material as supplied by the chemical vendor).

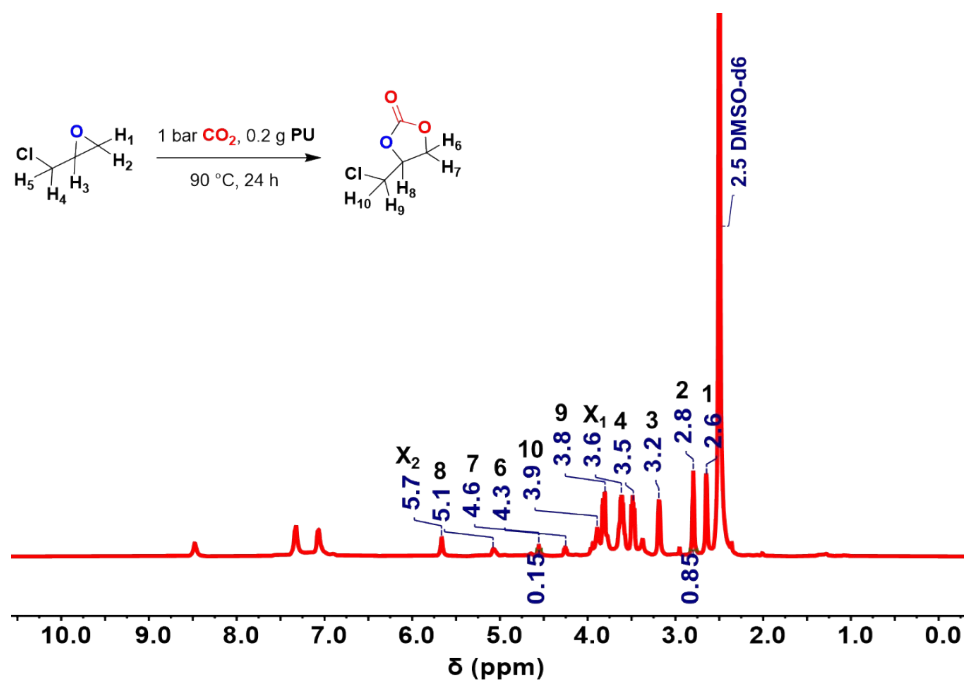

**Figure S6.** <sup>1</sup>H NMR spectrum of the reaction mixture after the conversion of ECH into its corresponding carbonate in DMSO-*d*<sub>6</sub>, X<sub>1</sub> and X<sub>2</sub>: corresponding for the 3-chloropropane-1,2-diol (from the starting material as supplied by the chemical vendor). Peaks centered at 7.0, 7.3 and 8.4 corresponding to the PU catalyst.

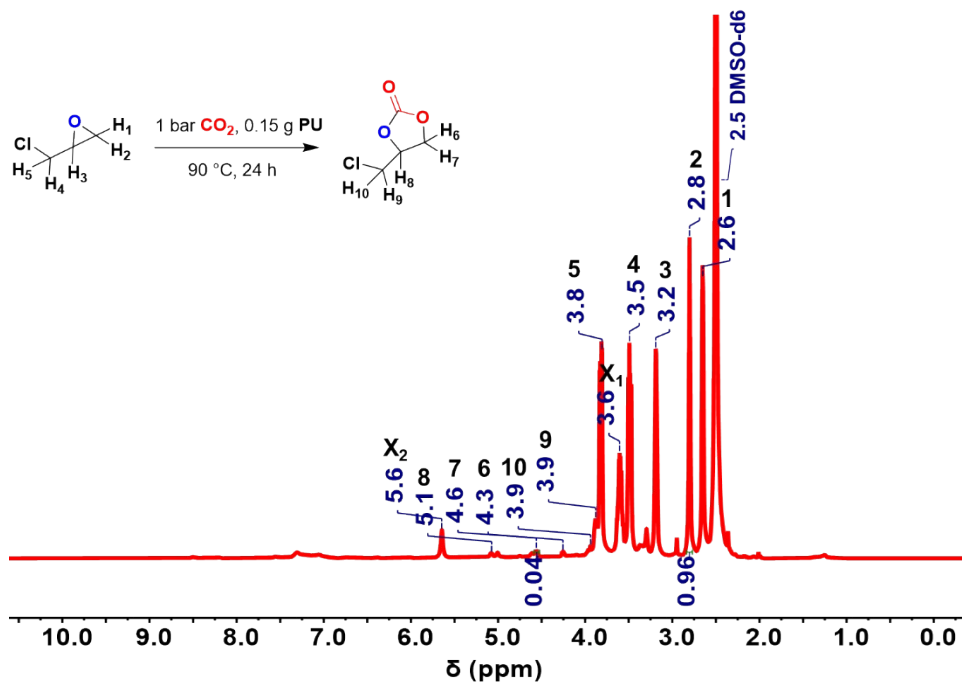

**Figure S7.** <sup>1</sup>H NMR spectrum of the reaction mixture after the conversion of ECH into its corresponding carbonate in DMSO-*d*<sub>6</sub>, X<sub>1</sub> and X<sub>2</sub>: corresponding for the 3-chloropropane-1,2-diol (from the starting material as supplied by the chemical vendor).

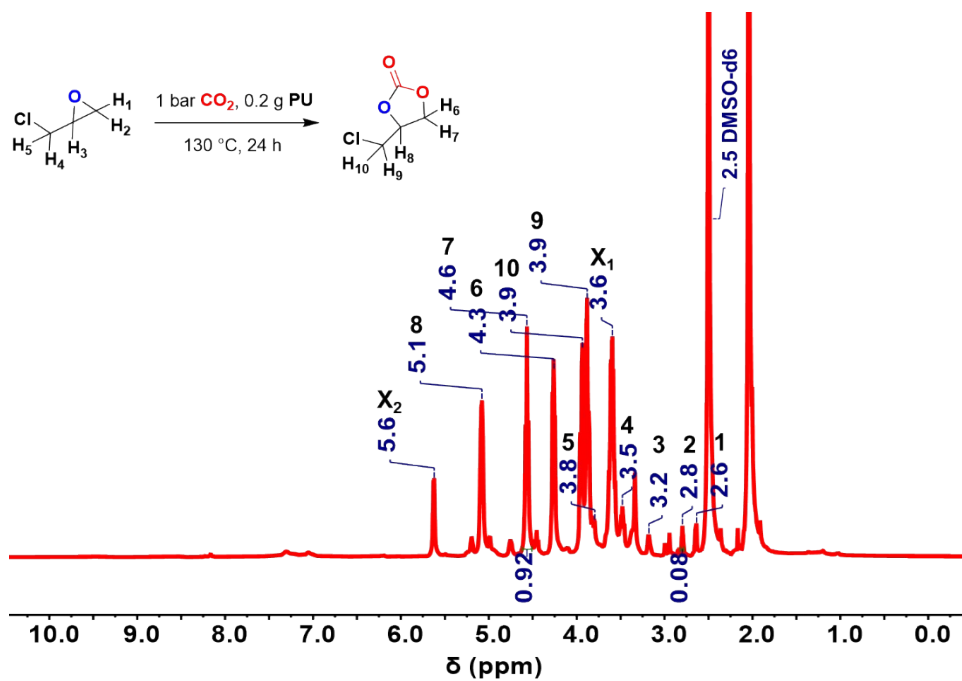

**Figure S8.** <sup>1</sup>H NMR spectrum of the reaction mixture after the conversion of ECH into its corresponding carbonate in DMSO-*d*<sub>6</sub>, X<sub>1</sub> and X<sub>2</sub>: corresponding for the 3-chloropropane-1,2-diol (from the starting material as supplied by the chemical vendor).

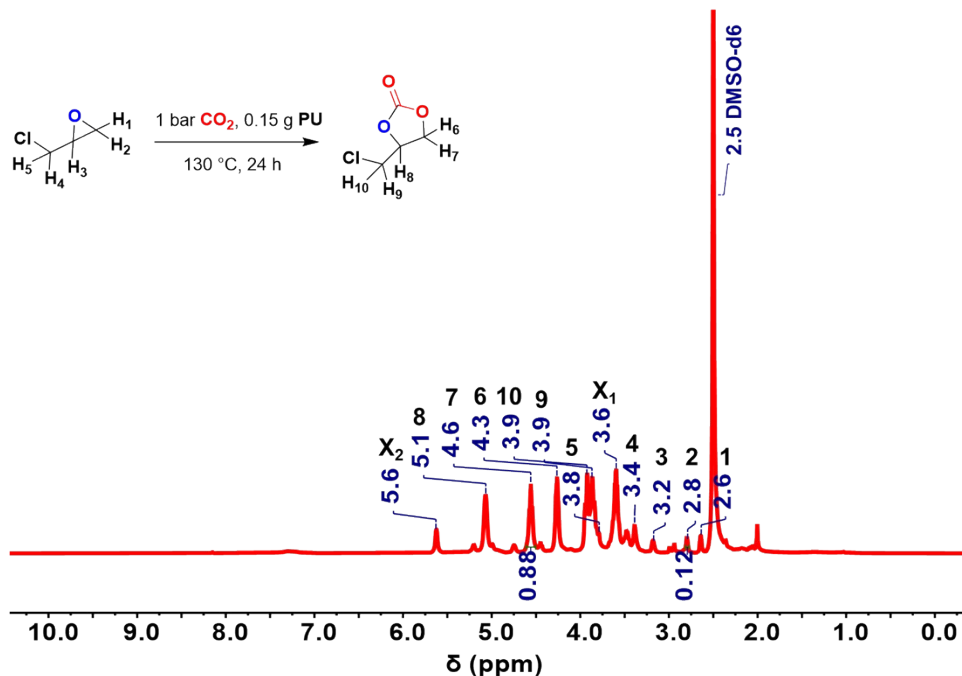

**Figure S9.** <sup>1</sup>H NMR spectrum of the reaction mixture after the conversion of ECH into its corresponding carbonate in DMSO-*d*<sub>6</sub>, X<sub>1</sub> and X<sub>2</sub>: corresponding for the 3-chloropropane-1,2-diol (from the starting material as supplied by the chemical vendor).

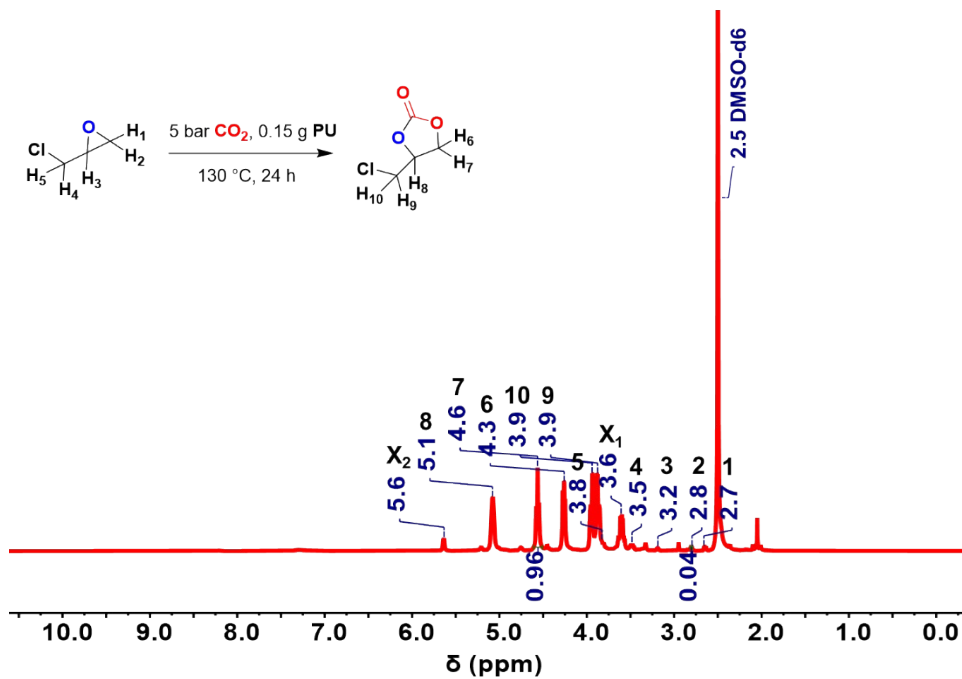

**Figure S10.** <sup>1</sup>H NMR spectrum of the reaction mixture after the conversion of ECH into its corresponding carbonate in DMSO-*d*<sub>6</sub>, X<sub>1</sub> and X<sub>2</sub>: corresponding for the 3-chloropropane-1,2-diol (from the starting material as supplied by the chemical vendor).

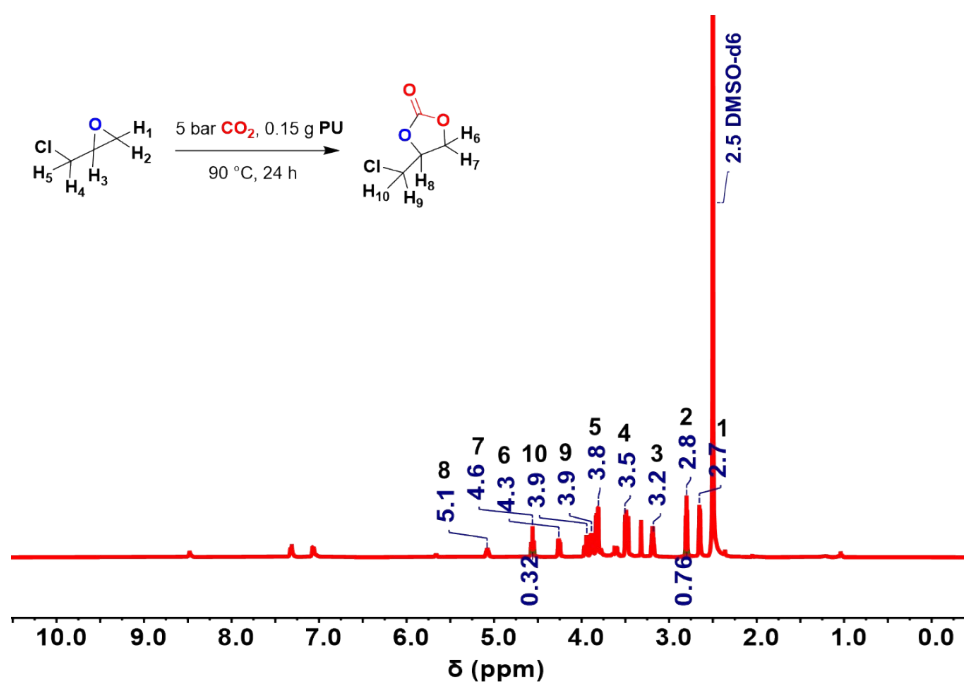

**Figure S11.** <sup>1</sup>H NMR spectrum of the reaction mixture after the conversion of ECH into its corresponding carbonate in DMSO-*d*<sub>6</sub>. Peaks centered at 7.1, 7.3 and 8.5 corresponding to the PU catalyst.

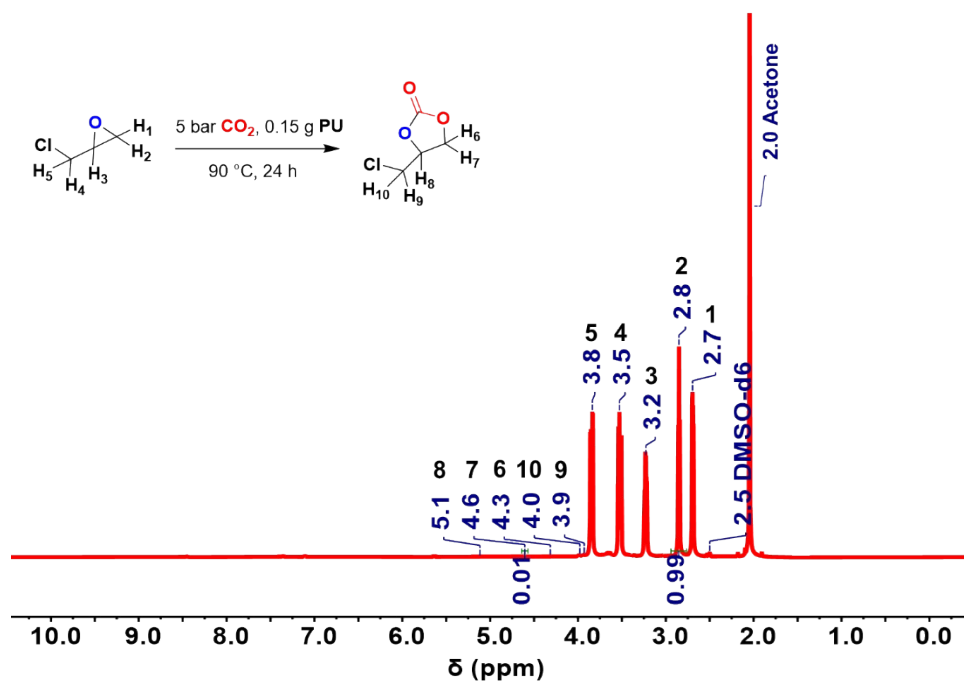

**Figure S12.** <sup>1</sup>H NMR spectrum of the reaction mixture after the conversion of ECH into its corresponding carbonate in DMSO-*d*<sub>6</sub>.

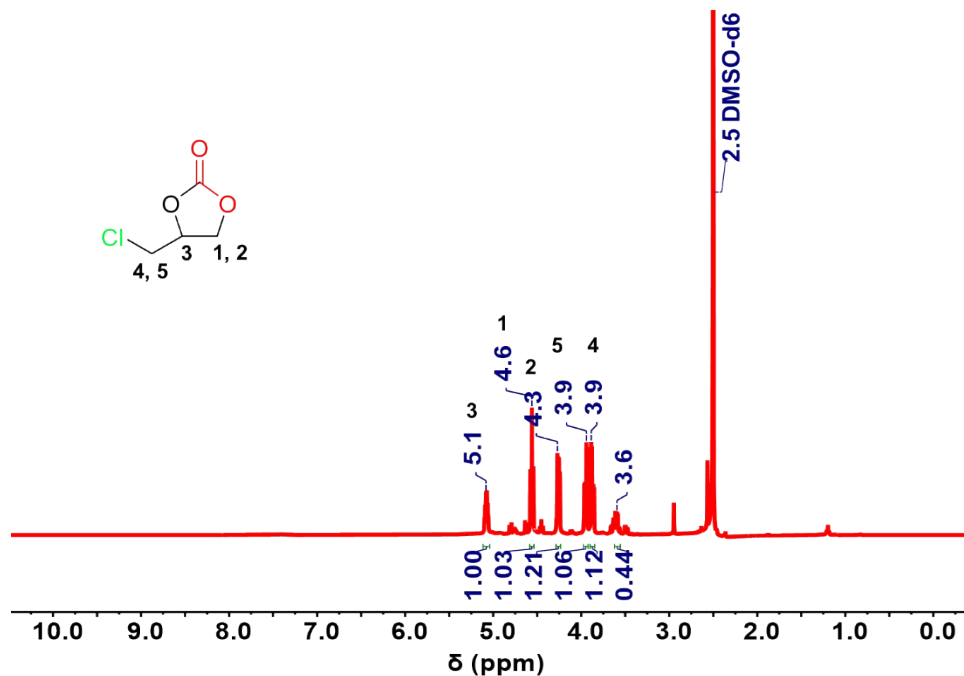

**Figure S13.**  $^1\text{H}$  NMR spectrum of the isolated 4-chloromethyl-2-oxo-1,3-dioxolane in  $\text{DMSO-}d_6$ , peak at 3.6 corresponds to 3-chloropropane-1,2-diol (from the starting material as supplied by the chemical vendor).

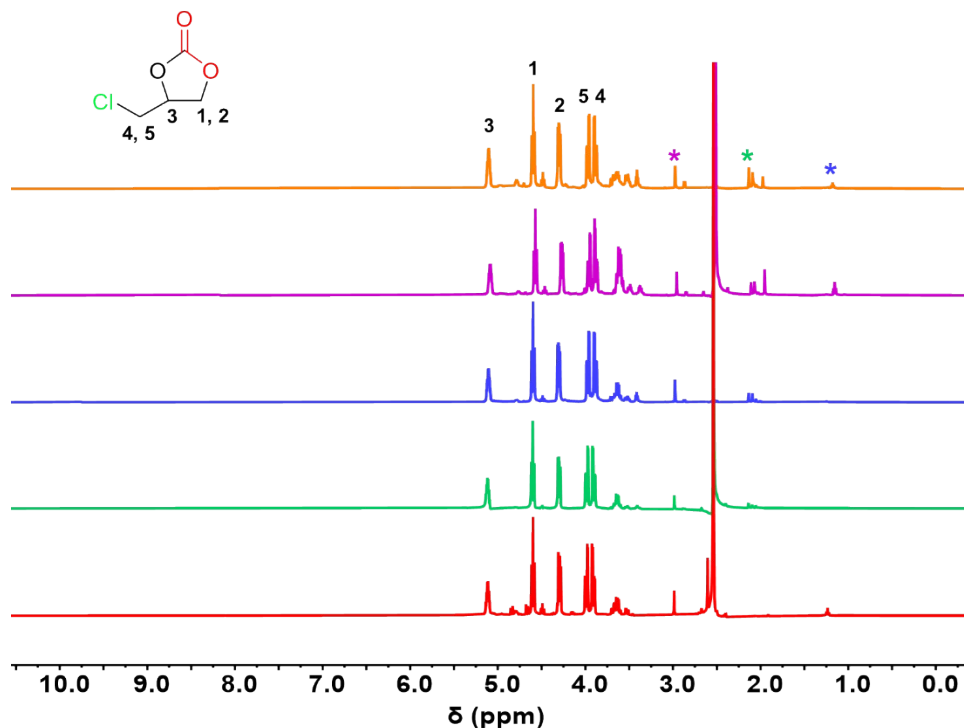

**Figure S14.**  $^1\text{H}$  NMR spectra of the isolated 4-chloromethyl-2-oxo-1,3-dioxolane in  $\text{DMSO-}d_6$ , for five consecutive cycles (first run). Peaks at 3.6 correspond to 3-chloropropane-1,2-diol (from the starting material as supplied by the chemical vendor). Peaks labelled with asterisk corresponding to traces of residual solvents used in the isolation process (blue asterisk for hexane, green asterisk for ethyl acetate, and purple asterisk for methanol).

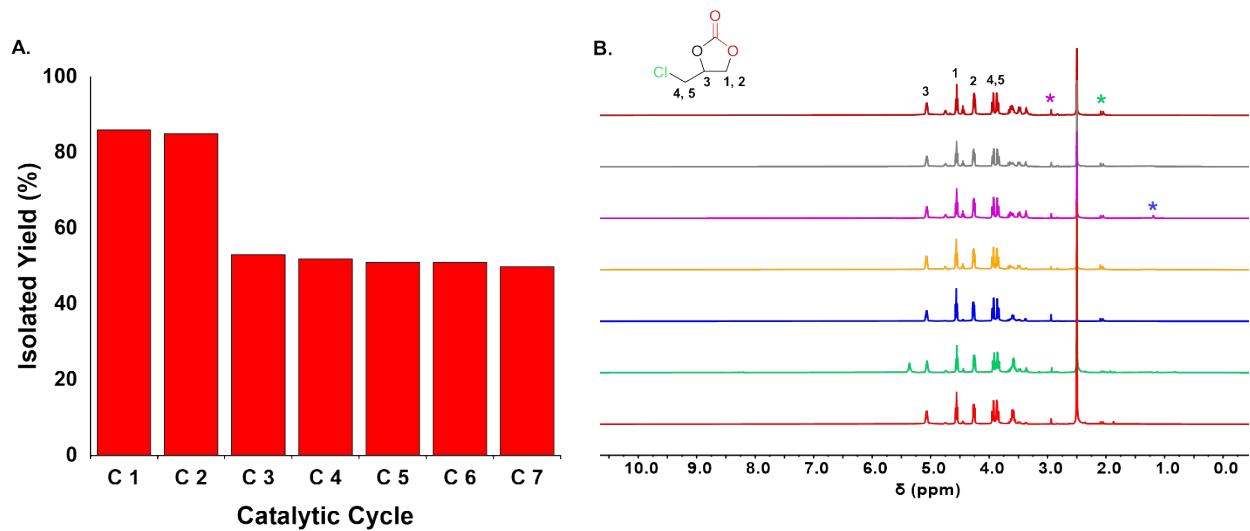

**Figure S15. A.** The recyclability of **PU** over seven catalytic cycles for the reaction of ECH and  $\text{CO}_2$  (second run). **B.**  $^1\text{H}$  NMR spectra of the isolated 4-chloromethyl-2-oxo-1,3-dioxolane in  $\text{DMSO-}d_6$ , peaks at 3.6 and 5.3 correspond to 3-chloropropane-1,2-diol (from the starting material as supplied by the chemical vendor). Peaks labelled with asterisk corresponding to traces of residual solvents used in the isolation process (blue asterisk for hexane, green asterisk for ethyl acetate, and purple asterisk for methanol).

### 3. Side reaction of PU with ECH

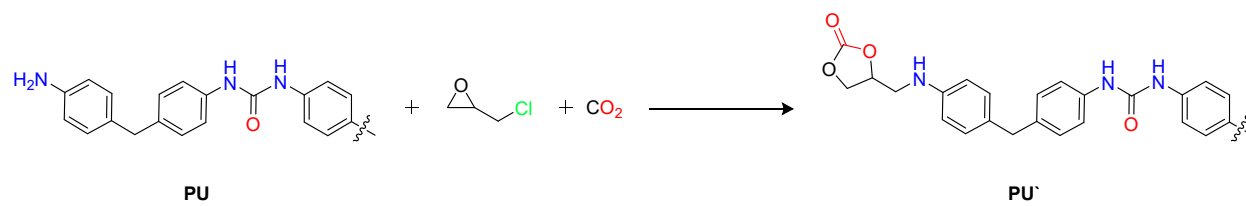

**Scheme S1.** The side reaction of the **PU** with ECH and CO<sub>2</sub> to produce the **PU'**.

#### 4. DFT-optimized geometries

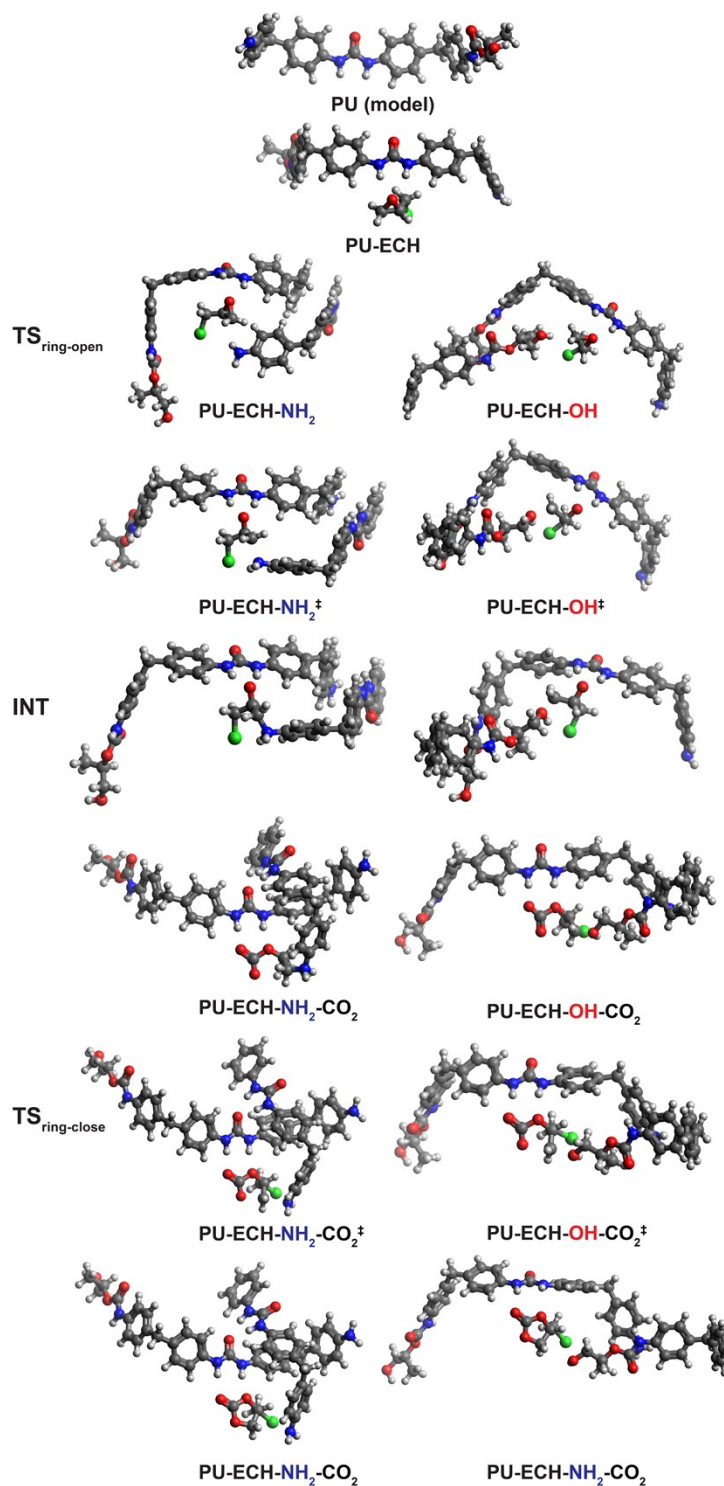

**Figure S16.** DFT-optimized geometries of all species involved in the calculated reaction profile. Calculations were performed at B3LPY/6-311+G(d)-D3 in DMSO.
